# Supplementary material for: Bax deficiency extends the survival of Ku70 knockout mice that develop lung and heart diseases
Source: PubMed Central journal article supplement (PMC4385910; doi:10.1038/cddis.2015.11), 2015-03-26
Supplement: cddis201511x3.pdf [file cddis201511x3.pdf]

# Figure S1

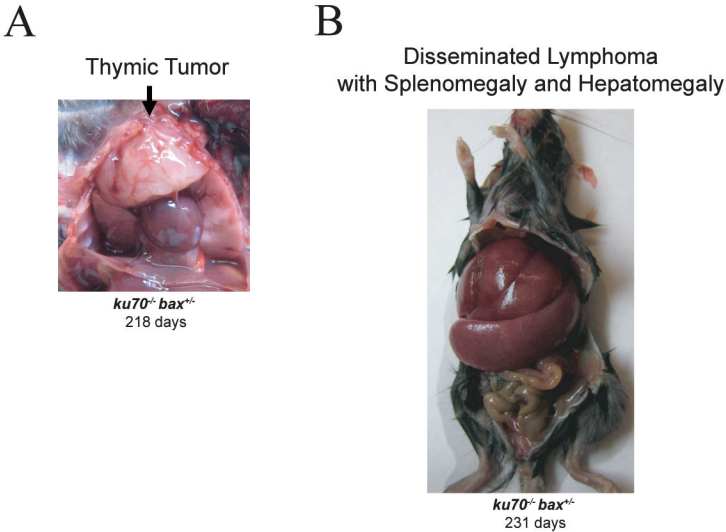

Figure S1. Examples of a (A) thymic tumor and (B) disseminated lymphoma with splenomegaly and hepatomegaly.
