# Supplementary material for: Bax deficiency extends the survival of Ku70 knockout mice that develop lung and heart diseases
Source: PubMed Central journal article supplement (PMC4385910; doi:10.1038/cddis.2015.11), 2015-03-26
Supplement: cddis201511x6.pdf [file cddis201511x6.pdf]

Figure S4

**Lungs-TUNEL**

100-200 days

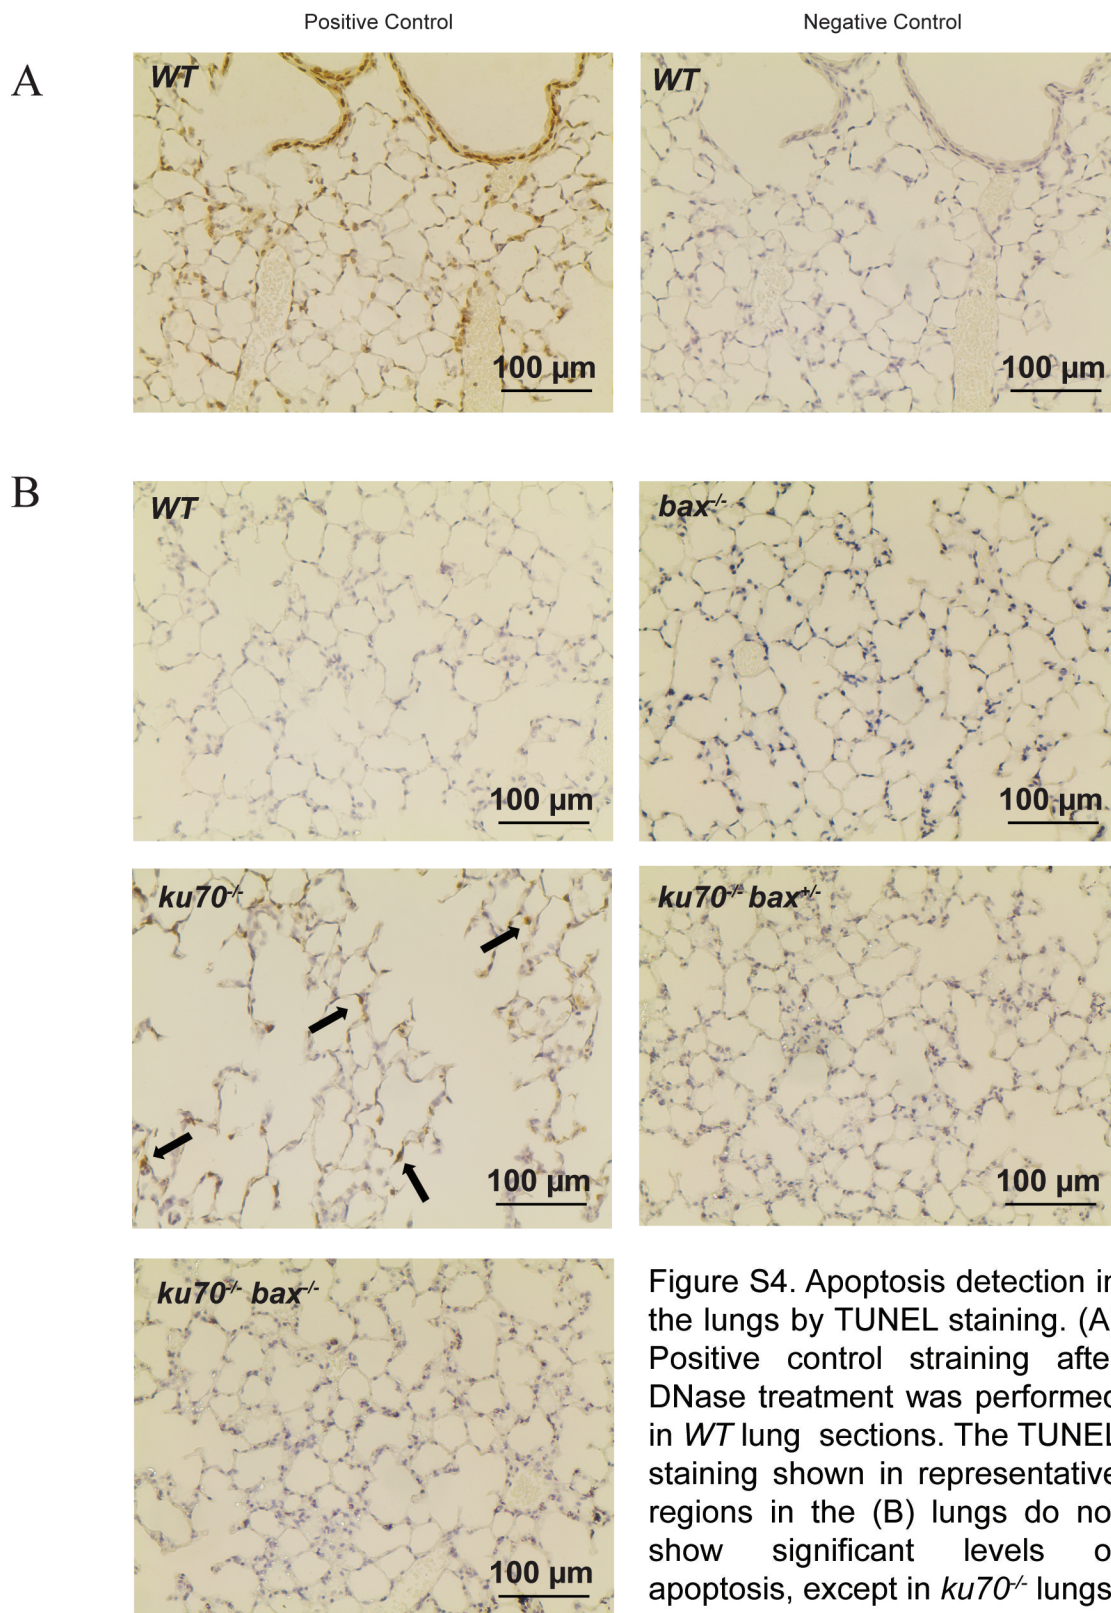

Figure S4. Apoptosis detection in the lungs by TUNEL staining. (A) Positive control staining after DNase treatment was performed in *WT* lung sections. The TUNEL staining shown in representative regions in the (B) lungs do not show significant levels of apoptosis, except in *ku70*<sup>-/-</sup> lungs.
